# Supplementary material for: A theoretical study on the hetero-Diels–Alder reaction of phosphorous substituted diaza- and oxaza-alkenes with olefins derivatives
Source: Royal Society of Chemistry journal article supplement (doi:10.1039/c6ra15496d), 2016-01-01

**TableS1-** The calculated activation enthalpies ( $\Delta H^\ddagger/\text{kcalmol}^{-1}$ ), reaction enthalpies ( $\Delta H_r/\text{kcalmol}^{-1}$ ) and entropy ( $\Delta S/\text{calmol}^{-1}\text{k}^{-1}$ ) of the HDA reactions between 1,2-diaza-1,3-butadiene and 1,2-oxaza-1,3-butadienes derivatives (**3** and **4**) with some olefins (**5**, **10** and **15**) at the B3LYP/cc-pVDZ level of theory.

| Species   | TSs   | $\Delta H^\ddagger$ | $\Delta S^\ddagger$ | $\Delta H_r$ | $\Delta S_r$ |
|-----------|-------|---------------------|---------------------|--------------|--------------|
| 3a+5a→6aa | TS1aa | 10.60               | -49.81              | -37.65       | -57.21       |
| 3a+5a→7aa | TS2aa | 18.95               | -50.09              | -42.48       | -56.01       |
| 3a+5a→8aa | TS3aa | 15.75               | -47.96              | -42.98       | -58.62       |
| 3a+5a→9aa | TS4aa | 16.82               | -50.78              | -42.35       | -55.20       |
| 3b+5a→6ba | TS1ba | 10.29               | -40.98              | -44.54       | -45.01       |
| 3b+5a→7ba | TS2ba | 11.29               | -43.87              | -44.50       | -47.02       |
| 3b+5a→8ba | TS3ba | 13.62               | -45.42              | -44.99       | -48.91       |
| 3b+5a→9ba | TS4ba | 12.61               | -49.55              | -44.49       | -46.35       |
| 3a+5b→6ab | TS1ab | 12.29               | -51.76              | -32.63       | -58.97       |
| 3a+5b→7ab | TS2ab | 16.94               | -53.25              | -37.96       | -57.24       |
| 3a+5b→8ab | TS3ab | 10.85               | -53.05              | -32.86       | -59.34       |
| 3a+5b→9ab | TS4ab | 15.93               | -53.51              | -37.45       | -57.40       |
| 3b+5b→6bb | TS1bb | 12.12               | -44.13              | -40.32       | -46.37       |
| 3b+5b→7bb | TS2bb | 13.93               | -45.77              | -40.31       | -48.98       |
| 3b+5b→8bb | TS3bb | 10.52               | -43.42              | -40.18       | -49.56       |
| 3b+5b→9bb | TS4bb | 13.04               | -44.87              | -39.74       | -49.89       |
| 3a+10→11a | TS5a  | 19.84               | -54.10              | -36.77       | -58.19       |
| 3a+10→12a | TS6a  | 14.67               | -53.52              | -38.40       | -59.25       |
| 3a+10→13a | TS7a  | 19.57               | -54.78              | -34.64       | -63.58       |
| 3a+10→14a | TS8a  | 23.84               | -55.52              | -38.59       | -59.84       |
| 3b+10→11b | TS5b  | 11.88               | -46.30              | -43.79       | -50.61       |
| 3b+10→12b | TS6b  | 12.72               | -49.94              | -40.47       | -50.88       |
| 3b+10→13b | TS7b  | 13.48               | -44.61              | -40.85       | -52.36       |
| 3b+10→14b | TS8b  | 16.50               | -48.37              | -43.99       | -50.06       |
| 4a+15→16a | TS9a  | 6.83                | -58.77              | -41.32       | -61.82       |
| 4a+15→17a | TS10a | 7.73                | -57.69              | -42.78       | -62.46       |
| 4a+15→18a | TS11a | 17.14               | -59.82              | -36.07       | -62.17       |
| 4a+15→19a | TS12a | 22.18               | -61.38              | -32.03       | -61.71       |
| 4b+15→16b | TS9b  | 7.04                | -56.30              | -42.74       | -58.70       |
| 4b+15→17b | TS10b | 5.27                | -53.07              | -46.52       | -57.35       |
| 4b+15→18b | TS11b | 21.09               | -56.53              | -38.09       | -58.19       |
| 4b+15→19b | TS12b | 19.86               | -58.52              | -37.69       | -60.88       |
| 4c+15→16c | TS9c  | 10.40               | -53.58              | -43.88       | -56.27       |
| 4c+15→17c | TS10c | 5.95                | -52.42              | -45.28       | -58.86       |
| 4c+15→18c | TS11c | 18.62               | -52.36              | -34.65       | -56.18       |
| 4c+15→19c | TS12c | 21.74               | -52.77              | -36.61       | -58.43       |

**Table S2-** Calculated activation energies ( $\Delta E^\ddagger/\text{kcalmol}^{-1}$ ) and reaction energies ( $\Delta E_r/\text{kcalmol}^{-1}$ ) of *ortho* pathways of the HDA reactions between 1,2-diaza-1,3-butadiene and 1,2-oxaza-1,3-butadienes derivatives (**3** and **4**) with some olefins (**5**, **10** and **15**) at the MPWB1K level of theory.

| Species   | TSs   | $\Delta E^\ddagger$ | $\Delta E_r$ |
|-----------|-------|---------------------|--------------|
| 3a+5a→6aa | TS1aa | 6.67                | -60.27       |
| 3a+5a→7aa | TS2aa | 10.82               | -64.44       |
| 3b+5a→8ba | TS1ba | 6.13                | -67.01       |
| 3b+5a→9ba | TS2ba | 7.85                | -67.18       |
| 3a+5b→6ab | TS1ab | 7.66                | -53.61       |
| 3a+5b→7ab | TS2ab | 9.68                | -58.78       |
| 3b+5b→8bb | TS1bb | 7.21                | -61.68       |
| 3b+5b→9bb | TS2bb | 10.46               | -61.80       |
| 3a+10→11a | TS5a  | 12.34               | -57.73       |
| 3a+10→12a | TS6a  | 7.29                | -61.36       |
| 3b+10→11b | TS5b  | 7.27                | -62.11       |
| 3b+10→12b | TS6b  | 7.05                | -66.66       |
| 4a+15→16a | TS9a  | 2.98                | -59.38       |
| 4a+15→17a | TS10a | 5.52                | -60.89       |
| 4b+15→16b | TS9b  | 4.52                | -59.66       |
| 4b+15→17b | TS10b | 0.97                | -63.94       |
| 4c+15→16c | TS9c  | 7.62                | -60.63       |
| 4c+15→17c | TS10c | 6.21                | -63.09       |

**Table S3-** Calculated activation energies ( $\Delta E^\ddagger/\text{kcalmol}^{-1}$ ) and reaction energies ( $\Delta E_r/\text{kcalmol}^{-1}$ ) of *meta* pathways of the HDA reactions 1,2-diaza-1,3-butadiene (**3**) and 1,2-oxaza-1,3-butadienes derivatives (**4**) with some olefins (**5**, **10** and **15**) at the MPWB1K level of theory.

| Species   | TS    | $\Delta E^\ddagger$ | $\Delta E_r$ |
|-----------|-------|---------------------|--------------|
| 3a+5a→8aa | TS3aa | 12.42               | -64.62       |
| 3a+5a→9aa | TS4aa | 13.56               | -63.90       |
| 3b+5a→8ba | TS3ba | 9.61                | -66.92       |
| 3b+5a→9ba | TS4ba | 9.58                | -66.35       |
| 3a+5b→8ab | TS3ab | 10.05               | -54.25       |
| 3a+5b→9ab | TS4ab | 11.58               | -57.53       |
| 3b+5b→8bb | TS3bb | 9.69                | -61.72       |
| 3b+5b→9bb | TS4bb | 12.92               | -61.53       |
| 3a+10→13a | TS7a  | 15.65               | -59.09       |
| 3a+10→14a | TS8a  | 17.85               | -62.02       |
| 3b+10→13b | TS7b  | 8.58                | -64.75       |
| 3b+10→14b | TS8b  | 10.35               | -66.95       |
| 4a+15→18a | TS11a | 13.99               | -53.61       |
| 4a+15→19a | TS12a | 19.58               | -50.46       |
| 4b+15→18b | TS11b | 19.69               | -54.67       |
| 4b+15→19b | TS12b | 17.39               | -54.88       |
| 4c+15→18c | TS11c | 17.41               | -51.24       |
| 4c+15→19c | TS12c | 23.16               | -53.61       |

**Figure S1-** The geometrical optimized of transition states for *meta* pathways of the HDA reactions between 1,2-diaza-1,3-butadiene derivatives (**3a** and **3**) and some olefins (**5a** and **5**) at the B3LYP/cc-pVDZ level of theory. Bond distances are given in Å, wiberg bond indices are given in parenthesis and the natural charges (*CT*) of TSs are also given.

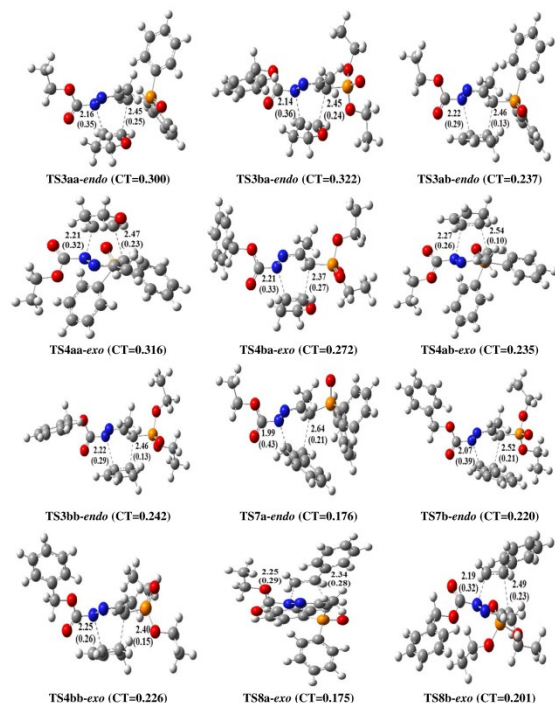

**Figure S2-** The geometrical optimized of transition states for *meta* pathways of the HDA reactions between 1,2-oxaza-1,3-butadiene derivatives (**4a** and **4**) and ethoxyethen (**15**) at the B3LYP/cc-pVDZ level of theory. Bond distances are given in Å, wiberg bond indices are given in parenthesis and the natural charges (*CT*) of TSs are also given.

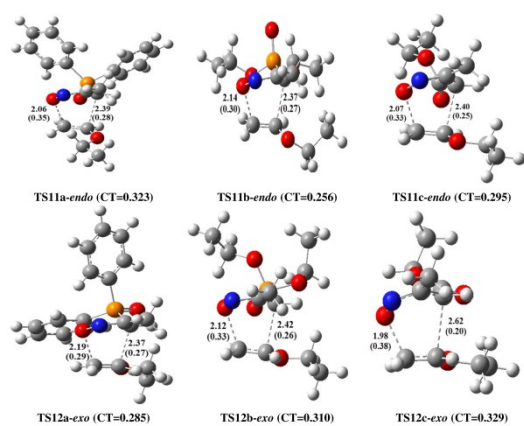

Supplement: c6ra15496d1.pdf [file c6ra15496d1.pdf]
